# Supplementary material for: Safety and Immunogenicity of the BNT162b2 Vaccine Coadministered with Seasonal Inactivated Influenza Vaccine in Adults
Source: Springer Nature journal article supplement (doi:10.1007/s40121-023-00863-5), 2023-09-01

**Safety and Immunogenicity of the BNT162b2 Vaccine Coadministered With Seasonal  
Inactivated Influenza Vaccine in Adults**

**Authors:** Louise Murdoch, MBBS,<sup>1</sup> Karen Quan, BSc, MBBS, DPM,<sup>2</sup> James A. Baber, MBChB, MPH,<sup>2</sup> Agnes W.Y. Ho, MS, MMSc,<sup>3</sup> Ying Zhang, PhD,<sup>3</sup> Xia Xu, PhD,<sup>3</sup> Claire Lu, PhD,<sup>4</sup> David Cooper, PhD,<sup>4</sup> Kenneth Koury, PhD,<sup>4</sup> Stephen P. Lockhart, DM,<sup>5</sup> Annaliesa S. Anderson, PhD,<sup>4</sup> Özlem Türeci, MD,<sup>6</sup> Uğur Şahin, MD,<sup>6</sup> Kena A. Swanson, PhD,<sup>4</sup> William C. Gruber, MD,<sup>4</sup> Nicholas Kitchin, MD,<sup>5</sup> on behalf of the C4591030 Clinical Trial Group

**Affiliations:** <sup>1</sup>Emeritus Research, Camberwell, VIC, Australia; <sup>2</sup>Vaccine Clinical Research and Development, Pfizer Australia Pty Ltd, Sydney, NSW, Australia; <sup>3</sup>Vaccine Research and Development, Pfizer Inc, Collegeville, PA, USA; <sup>4</sup>Vaccine Research and Development, Pfizer Inc, Pearl River, NY, USA; <sup>5</sup>Vaccine Research and Development, Pfizer Ltd, Hurley, UK; <sup>6</sup>BioNTech, Mainz, Germany

**Corresponding author:**

Karen Quan, BSc, MB, BS, DPM  
Vaccine Clinical Research and Development, Pfizer  
Sydney, NSW Australia  
Telephone: +61 2 9850 3848  
Email: Karen.Quan@pfizer.com  
Personal classification: Vaccines

**SUPPLEMENTARY MATERIAL**

## List of Investigators\*

| <b>Name</b>                                    | <b>Institution</b>                                                     | <b>Location</b>               |
|------------------------------------------------|------------------------------------------------------------------------|-------------------------------|
| Arya, Mark (Ktut)                              | Australian Clinical Research Network                                   | Sydney, NSW, Australia        |
| Athan, Eugene                                  | Barwon Health                                                          | Geelong, VIC, Australia       |
| Blackmore, Timothy (previously Balm, Michelle) | Capital, Coast and Hutt Valley District - Wellington Regional Hospital | Wellington, New Zealand       |
| Bull, Sheetal                                  | Paratus Clinical Research Brisbane                                     | Albion, QLD, Australia        |
| Edwards, Andrew                                | P3 Research - Kapiti                                                   | Paraparaumu, New Zealand      |
| Esquilant, Emma                                | P3 Research – Hawke`s Bay                                              | Havelock North, New Zealand   |
| Finlay, Joanne (previously Carson, Simon)      | Pacific Clinical Research Network – Forte                              | Christchurch, New Zealand     |
| Hamilton, Paul                                 | New Zealand Clinical Research (Auckland)                               | Auckland, New Zealand         |
| Hemi, Tiwini                                   | Lakeland Clinical Trials Waikato                                       | Hamilton, New Zealand         |
| Humphrey, Timothy                              | Lakeland Clinical Trials Wellington                                    | Upper Hutt, New Zealand       |
| Kamerbeek, Jackie                              | P3 Research - Tauranga                                                 | Tauranga, New Zealand         |
| Kerr, Jane                                     | New Zealand Clinical Research (Christchurch)                           | Christchurch, New Zealand     |
| Kok, Jen                                       | Westmead Hospital                                                      | Westmead, NSW, Australia      |
| McGirr, Anthony                                | Northern Beaches Clinical Research                                     | Brookvale, NSW, Australia     |
| Montgomery, Barnaby                            | Optimal Clinical Trials                                                | Auckland, New Zealand         |
| Murdoch, Louise                                | Emeritus Research                                                      | Camberwell, VIC, Australia    |
| Neville, A Munro                               | AusTrials – Wellers Hill                                               | Wellers Hill, QLD, Australia  |
| Quinn, Dean                                    | P3 Research - Wellington                                               | Wellington, New Zealand       |
| Sheahan, Davitt                                | Lakeland Clinical Trials Culloden                                      | Papamoa Beach, New Zealand    |
| Smith, Susan                                   | Southern Clinical Trials Waitemata Ltd                                 | Auckland, New Zealand         |
| Stubbs, Richard                                | P3 Research - Palmerston North                                         | Palmerston North, New Zealand |
| Tagelagi, Maelen (previously King, Craig)      | Southern Clinical Trials Totara                                        | Auckland, New Zealand         |
| Thurlow, Claire                                | Southern Clinical Trials Tasman                                        | Nelson, New Zealand           |
| Williams, Michael                              | Pacific Clinical Research Network – Rotorua                            | Rotorua, New Zealand          |
| Wojciechowska, Joanna                          | Aotearoa Clinical Trials                                               | Auckland, New Zealand         |

\*Investigators who randomized participants.

### **Additional Eligibility Criteria**

Participants were also excluded from the study if any of the following criteria applied:

- Other medical or psychiatric condition, including recent (within the past year) or active suicidal ideation/behavior, or laboratory abnormality that may increase the risk of study participation
- Allergy to egg proteins (egg or egg products) or chicken proteins
- Bleeding diathesis or condition associated with prolonged bleeding that would contraindicate intramuscular injection
- Individuals who receive treatment with radiotherapy or immunosuppressive therapy, including cytotoxic agents or systemic corticosteroids (if systemic corticosteroids are administered for  $\geq 14$  days at a dose of  $\geq 20$  mg/day of prednisone or equivalent), eg, for chronic obstructive pulmonary disease, or planned receipt throughout the study. Inhaled/nebulized, intra-articular, intrabursal, or topical (skin or eyes) corticosteroids were permitted
- Receipt of blood/plasma products or immunoglobulin from 60 days before study vaccine administration or planned receipt throughout the study
- Receipt of any passive antibody therapy specific to COVID-19 from 90 days before study vaccine administration or planned receipt throughout the study

### **Vaccination Temporary Delay Criteria**

The following conditions were considered temporary or self-limiting and a participant could be vaccinated once the condition(s) resolved and no other exclusion criteria were met.

Participants meeting these criteria at Vaccination 1 were considered screen failures if enrollment had closed once the condition(s) resolved.

- Current febrile illness (oral temperature  $\geq 38.0^{\circ}\text{C}$  [ $\geq 100.4^{\circ}\text{F}$ ]) or other acute illness within 48 hours before study vaccine administration. This included a positive SARS-CoV-2 test result (NAAT or rapid antigen test) within 28 days.
- Receipt of any nonstudy vaccine within 28 days before study vaccine administration.
- Anticipated receipt of any nonstudy vaccine within 28 days after study vaccine administration.

- Receipt of short-term (<14 days) systemic corticosteroids. Study vaccine administration was to be delayed until systemic corticosteroid use had been discontinued for  $\geq 28$  days. Inhaled/nebulized, intra-articular, intrabursal, or topical (skin or eyes) corticosteroids were permitted.

### **Prohibited Medications, Treatments, and Vaccines During the Study**

In addition to those outlined in the exclusion criteria, receipt of the following vaccines and medications during the time periods listed below may have excluded a participant from the per-protocol analysis from that point onward and may have required vaccinations to be discontinued in that participant; however, the participant would not necessarily be withdrawn from the study:

- Unless considered medically necessary, no vaccines other than the study vaccine were to be administered within 28 days before and 28 days after each study vaccination
- Receipt of chronic systemic treatment with known immunosuppressant medications, or radiotherapy, within 60 days before enrollment through conclusion of the study
- Receipt of any other (nonstudy) COVID-19 vaccine at any time during study participation
- Prophylactic antipyretics and other pain medication to prevent symptoms associated with study vaccine administration (however, if a participant was taking a medication for another condition, even if it may have antipyretic or pain-relieving properties, it was not to be withheld before administration of study vaccine; additionally, antipyretics and other pain medication to treat symptoms associated with study vaccine administration were permitted)

### **Sample Size Determination**

The sample size calculation was based on the primary immunogenicity estimands and corresponding endpoints (ie, full-length S-binding immunoglobulin G (IgG) levels and strain-specific hemagglutination inhibition assay titers). The following table presents the power to demonstrate noninferiority of the immune responses elicited by BNT162b2 and the seasonal inactivated influenza vaccine from the coadministration group to the separate-administration group.

| Endpoint                             | NI margin | SD in natural log scale <sup>a</sup> | Power                                    |
|--------------------------------------|-----------|--------------------------------------|------------------------------------------|
|                                      |           |                                      | Assumed GMR=0.9<br>N=450 evaluable/group |
| SARS-CoV-2 full-length S-binding IgG | 1.5-fold  | 1.05                                 | 98.8%                                    |
| HAI titers                           |           |                                      |                                          |
| A/H1N1                               | 1.5-fold  | 1.05                                 | 98.8%                                    |
| A/H3N2                               | 1.5-fold  | 1.07                                 | 98.5%                                    |
| B/Brisbane                           | 1.5-fold  | 1.13                                 | 97.4%                                    |
| B/Massachusetts                      | 1.5-fold  | 1.16                                 | 96.8%                                    |
| All <sup>b</sup>                     |           |                                      | 90.7%                                    |

GMR=geometric mean ratio; HAI=hemagglutination inhibition assay; IgG=immunoglobulin G; NI=noninferiority; S-binding=spike protein-binding; SD=standard deviation.

<sup>a</sup>Assay SDs for SARS-CoV-2 full-length S-binding IgG were based on the 1 month after dose 2 immunogenicity results from the C4591020 study (NCT04816669; 18–55 years of age), and the C4591001 study (NCT04368728; 56–85 years of age); assay SDs for HAI endpoints were based on results for Afluria Quad.<sup>1</sup>

<sup>b</sup>All=overall power to demonstrate noninferiority for all endpoints.

If the geometric mean ratio of the coadministration group to the separate-administration group was 0.9 for SARS-CoV-2 full-length S-binding IgG levels and for HAI titers of each influenza strain, with assumed standard deviations for each endpoint, a sample size of 450 evaluable participants per group was estimated to provide an overall power of 90.7% to declare noninferiority for all coprimary endpoints. Assuming a nonevaluable rate of 20%, the study was to randomize approximately 1126 participants to achieve 450 evaluable participants in each group.

<sup>1</sup> Treanor JT et al. *Vaccine* 2017;35:1856-1864.

**Table S1. Study populations**

| <b>Population</b>                 | <b>Definition</b>                                                                                                                                                                                                                                                                                                                                                                                                                                                                                                                                                                                                                                                                                                                                                                      |
|-----------------------------------|----------------------------------------------------------------------------------------------------------------------------------------------------------------------------------------------------------------------------------------------------------------------------------------------------------------------------------------------------------------------------------------------------------------------------------------------------------------------------------------------------------------------------------------------------------------------------------------------------------------------------------------------------------------------------------------------------------------------------------------------------------------------------------------|
| Enrolled                          | All participants who provided informed consent                                                                                                                                                                                                                                                                                                                                                                                                                                                                                                                                                                                                                                                                                                                                         |
| Randomized                        | All participants assigned a randomization number                                                                                                                                                                                                                                                                                                                                                                                                                                                                                                                                                                                                                                                                                                                                       |
| Evaluable BNT162b2 immunogenicity | All eligible, randomized participants who received all vaccinations at Visit 1 as randomized (coadministration group) or received all vaccinations at Visit 1 and Visit 2 as randomized (separate-administration group), had $\geq 1$ valid and determinate full-length S-binding IgG result from the blood sample collected within the predefined window (within 28–42 days after receipt of BNT162b2) at Visit 2 (coadministration group) or at Visit 3 (separate-administration group), had no reported COVID-19 or new SARS-CoV-2 infection after Visit 1 and through 1 month after BNT162b2 vaccination (Visit 2 for the coadministration group and Visit 3 for the separate administration group), and had no other important protocol deviations as determined by the clinician |
| Evaluable SIV immunogenicity      | All eligible randomized participants who received all vaccinations at Visit 1 as randomized, had $\geq 1$ valid and determinate HAI titer result from the blood sample collected within the predefined window at Visit 2 (within 28–42 days after receipt of SIV), and had no other important protocol deviations as determined by the clinician                                                                                                                                                                                                                                                                                                                                                                                                                                       |
| Safety                            | All participants who received any of the study vaccines                                                                                                                                                                                                                                                                                                                                                                                                                                                                                                                                                                                                                                                                                                                                |

HAI=hemagglutination inhibition assay; IgG=immunoglobulin G; SIV=seasonal inactivated influenza vaccine.

**Table S2. Immunogenicity populations**

|                                                                                                                                                                                                 | <b>Coadministration<br/>group<br/>(BNT162b2 +<br/>SIIV)/placebo<br/>n<sup>a</sup> (%)</b> | <b>Separate-<br/>administration group<br/>(Placebo +<br/>SIIV)/BNT162b2<br/>n<sup>a</sup> (%)</b> | <b>Total<br/>N<sup>a</sup> (%)</b> |
|-------------------------------------------------------------------------------------------------------------------------------------------------------------------------------------------------|-------------------------------------------------------------------------------------------|---------------------------------------------------------------------------------------------------|------------------------------------|
| Randomized <sup>b</sup>                                                                                                                                                                         | 568 (100.0)                                                                               | 566 (100.0)                                                                                       | 1134 (100.0)                       |
| Evaluable BNT162b2 immunogenicity population                                                                                                                                                    | 499 (87.9)                                                                                | 413 (73.0)                                                                                        | 912 (80.4)                         |
| Excluded from evaluable BNT162b2 immunogenicity population                                                                                                                                      | 69 (12.1)                                                                                 | 153 (27.0)                                                                                        | 222 (19.6)                         |
| Reason for exclusion <sup>c</sup>                                                                                                                                                               |                                                                                           |                                                                                                   |                                    |
| Did not receive all vaccinations at Visit 1 as randomized for coadministration group or did not receive all vaccinations at Visit 1 and Visit 2 as randomized for separate administration group | 4 (0.7)                                                                                   | 9 (1.6)                                                                                           | 13 (1.1)                           |
| Had reported COVID-19 or new SARS-CoV-2 infection after Visit 1 and through 1 month after BNT162b2 vaccination <sup>d</sup>                                                                     | 53 (9.3)                                                                                  | 122 (21.6)                                                                                        | 175 (15.4)                         |
| Did not have ≥1 valid and determinate full-length S-binding IgG result within 28–42 days after BNT162b2 vaccination                                                                             | 45 (7.9)                                                                                  | 41 (7.2)                                                                                          | 86 (7.6)                           |
| Had important protocol deviation as determined by the clinician                                                                                                                                 | 6 (1.1)                                                                                   | 6 (1.1)                                                                                           | 12 (1.1)                           |
| Evaluable SIIV immunogenicity population                                                                                                                                                        | 520 (91.5)                                                                                | 496 (87.6)                                                                                        | 1016 (89.6)                        |
| Excluded from the evaluable SIIV immunogenicity population                                                                                                                                      | 48 (8.5)                                                                                  | 70 (12.4)                                                                                         | 118 (10.4)                         |
| Reason for exclusion <sup>c</sup>                                                                                                                                                               |                                                                                           |                                                                                                   |                                    |
| Did not receive all vaccinations at Visit 1                                                                                                                                                     | 4 (0.7)                                                                                   | 2 (0.4)                                                                                           | 6 (0.5)                            |
| Did not have ≥1 valid and determinate HAI assay result within 28–42 days after SIIV vaccination                                                                                                 | 45 (7.9)                                                                                  | 69 (12.2)                                                                                         | 114 (10.1)                         |
| Had important protocol deviation as determined by the clinician                                                                                                                                 | 4 (0.7)                                                                                   | 4 (0.7)                                                                                           | 8 (0.7)                            |

HAI=hemagglutination inhibition assay; IgG=immunoglobulin G; N-binding=SARS-CoV-2 nucleoprotein-binding; S=spike protein; SIIV=seasonal inactivated influenza vaccine.

<sup>a</sup>Number of participants with the specified characteristic.

<sup>b</sup>These values are the denominators for the percentage calculations.

<sup>c</sup>Participants may have been excluded for more than 1 reason.

<sup>d</sup>1 month after BNT162b2 vaccination was Visit 2 for the coadministration group and Visit 3 for the separate-administration group.

**Table S3. Participants with HAI titer seroprotection before and 1 month after vaccination and seroconversion at 1 month after vaccination**

| Influenza strain | Response                           | Coadministration group<br>(BNT162b2 + SIIV)/placebo |                    |            | Separate-administration group<br>(placebo + SIIV)/BNT162b2 |                    |            |
|------------------|------------------------------------|-----------------------------------------------------|--------------------|------------|------------------------------------------------------------|--------------------|------------|
|                  |                                    | N <sup>a</sup>                                      | n <sup>b</sup> (%) | 95% CI     | N <sup>a</sup>                                             | n <sup>b</sup> (%) | 95% CI     |
| H1N1 A/Victoria  | Seroprotection: Before SIIV        | 509                                                 | 340 (66.8)         | 62.5, 70.9 | 478                                                        | 323 (67.6)         | 63.2, 71.8 |
|                  | Seroprotection: 1 month after SIIV | 516                                                 | 504 (97.7)         | 96.0, 98.8 | 492                                                        | 483 (98.2)         | 96.6, 99.2 |
|                  | Seroconversion: 1 month after SIIV | 508                                                 | 254 (50.0)         | 45.6, 54.4 | 478                                                        | 266 (55.6)         | 51.1, 60.2 |
| H3N2 A/Darwin    | Seroprotection: Before SIIV        | 514                                                 | 365 (71.0)         | 66.9, 74.9 | 482                                                        | 328 (68.0)         | 63.7, 72.2 |
|                  | Seroprotection: 1 month after SIIV | 519                                                 | 498 (96.0)         | 93.9, 97.5 | 491                                                        | 480 (97.8)         | 96.0, 98.9 |
|                  | Seroconversion: 1 month after SIIV | 514                                                 | 315 (61.3)         | 56.9, 65.5 | 482                                                        | 297 (61.6)         | 57.1, 66.0 |
| B/Austria        | Seroprotection: Before SIIV        | 515                                                 | 129 (25.0)         | 21.4, 29.0 | 483                                                        | 111 (23.0)         | 19.3, 27.0 |
|                  | Seroprotection: 1 month after SIIV | 514                                                 | 385 (74.9)         | 70.9, 78.6 | 491                                                        | 374 (76.2)         | 72.1, 79.9 |
|                  | Seroconversion: 1 month after SIIV | 511                                                 | 273 (53.4)         | 49.0, 57.8 | 480                                                        | 277 (57.7)         | 53.1, 62.2 |
| B/Phuket         | Seroprotection: Before SIIV        | 515                                                 | 260 (50.5)         | 46.1, 54.9 | 484                                                        | 230 (47.5)         | 43.0, 52.1 |
|                  | Seroprotection: 1 month after SIIV | 520                                                 | 441 (84.8)         | 81.4, 87.8 | 496                                                        | 418 (84.3)         | 80.8, 87.4 |
|                  | Seroconversion: 1 month after SIIV | 515                                                 | 187 (36.3)         | 32.1, 40.6 | 484                                                        | 183 (37.8)         | 33.5, 42.3 |

HAI=hemagglutination inhibition assay; SIIV=seasonal inactivated influenza vaccine.

Results are for the evaluable SIIV immunogenicity population. Exact 2-sided 95% CIs were calculated using the Clopper-Pearson method. Baseline was defined as Visit 1. Seroprotection is defined as HAI titer  $\geq 1:40$ . Seroconversion is defined as  $\geq 4$ -fold rise from before to after receipt of SIIV if the HAI titer is  $\geq 1:10$  before SIIV, or if the HAI titer is  $\geq 1:40$  after SIIV when the titer was  $< 1:10$  before SIIV.

<sup>a</sup> Number of participants in the specified group with valid and determinate assay results for the specified assay at the specified sampling timepoint (and also at baseline for seroconversion). These values are the denominator for the percentage calculations.

<sup>b</sup> Number of participants meeting seroprotection or seroconversion definition.



**Table S4. Severity scale for local reactions and systemic events**

|                             | <b>Mild</b>                               | <b>Moderate</b>                             | <b>Severe</b>                       | <b>Grade 4</b>                                                     |
|-----------------------------|-------------------------------------------|---------------------------------------------|-------------------------------------|--------------------------------------------------------------------|
| <b>Local reactions</b>      |                                           |                                             |                                     |                                                                    |
| Pain at the injection site  | Does not interfere with activity          | Interferes with activity                    | Prevents daily activity             | ED visit or hospitalization for severe pain                        |
| Redness                     | >2.0–5.0 cm (5–10 measuring device units) | >5.0–10.0 cm (11–20 measuring device units) | >10 cm (≥21 measuring device units) | Necrosis or exfoliative dermatitis                                 |
| Swelling                    | >2.0–5.0 cm (5–10 measuring device units) | >5.0–10.0 cm (11–20 measuring device units) | >10 cm (≥21 measuring device units) | Necrosis                                                           |
| <b>Systemic events</b>      |                                           |                                             |                                     |                                                                    |
| Fever                       | 38.0°C–38.4°C                             | >38.4°C–38.9°C                              | >38.9°C–40.0°C                      | >40.0°C                                                            |
| Vomiting                    | 1–2 times in 24 h                         | >2 times in 24 h                            | Requires IV hydration               | ED visit or hospitalization for hypotensive shock                  |
| Diarrhea                    | 2–3 loose stools in 24 h                  | 4–5 loose stools in 24 h                    | ≥6 loose stools in 24 h             | ED visit or hospitalization for severe diarrhea                    |
| Headache                    | Does not interfere with activity          | Some interference with activity             | Prevents daily routine activity     | ED visit or hospitalization for severe headache                    |
| Fatigue/tiredness           | Does not interfere with activity          | Some interference with activity             | Prevents daily routine activity     | ED visit or hospitalization for severe fatigue                     |
| Chills                      | Does not interfere with activity          | Some interference with activity             | Prevents daily routine activity     | ED visit or hospitalization for severe chills                      |
| New or worsened muscle pain | Does not interfere with activity          | Some interference with activity             | Prevents daily routine activity     | ED visit or hospitalization for severe new or worsened muscle pain |
| New or worsened joint pain  | Does not interfere with activity          | Some interference with activity             | Prevents daily routine activity     | ED visit or hospitalization for severe new or worsened joint pain  |

ED=emergency department; IV=intravenous.

**Table S5. Adverse events reported within 1 month after vaccination<sup>a</sup>**

| System organ class<br>Preferred term                 | Coadministration group                             |                                             | Separate-administration group                     |                                              |
|------------------------------------------------------|----------------------------------------------------|---------------------------------------------|---------------------------------------------------|----------------------------------------------|
|                                                      | Visit 1<br>BNT162b2 + SIV<br>(N <sup>b</sup> =564) | Visit 2<br>placebo<br>(N <sup>b</sup> =562) | Visit 1<br>SIV + placebo<br>(N <sup>b</sup> =564) | Visit 2<br>BNT162b2<br>(N <sup>b</sup> =557) |
|                                                      | n <sup>c</sup> (%)                                 | n <sup>c</sup> (%)                          | n <sup>c</sup> (%)                                | n <sup>c</sup> (%)                           |
| Blood and lymphatic system disorders                 | 3 (0.5)                                            | 1 (0.2)                                     | 0                                                 | 0                                            |
| Lymphadenopathy                                      | 3 (0.5)                                            | 1 (0.2)                                     | 0                                                 | 0                                            |
| Cardiac disorders                                    | 5 (0.9)                                            | 0                                           | 0                                                 | 2 (0.4)                                      |
| Palpitations                                         | 4 (0.7)                                            | 0                                           | 0                                                 | 1 (0.2)                                      |
| Gastrointestinal disorders                           | 6 (1.1)                                            | 3 (0.5)                                     | 6 (1.1)                                           | 7 (1.3)                                      |
| Vomiting                                             | 2 (0.4)                                            | 0                                           | 1 (0.2)                                           | 3 (0.5)                                      |
| General disorders and administration site conditions | 35 (6.2)                                           | 12 (2.1)                                    | 36 (6.4)                                          | 13 (2.3)                                     |
| Influenza-like illness                               | 9 (1.6)                                            | 9 (1.6)                                     | 12 (2.1)                                          | 7 (1.3)                                      |
| Injection site pain                                  | 16 (2.8)                                           | 1 (0.2)                                     | 14 (2.5)                                          | 1 (0.2)                                      |
| Injection site erythema                              | 3 (0.5)                                            | 0                                           | 5 (0.9)                                           | 0                                            |
| Chest pain                                           | 3 (0.5)                                            | 0                                           | 0                                                 | 2 (0.4)                                      |
| Infections and infestations                          | 105 (18.6)                                         | 123 (21.9)                                  | 109 (19.3)                                        | 103 (18.5)                                   |
| COVID-19                                             | 46 (8.2)                                           | 63 (11.2)                                   | 56 (9.9)                                          | 48 (8.6)                                     |
| Upper respiratory tract infection                    | 27 (4.8)                                           | 31 (5.5)                                    | 24 (4.3)                                          | 22 (3.9)                                     |
| Gastroenteritis                                      | 8 (1.4)                                            | 6 (1.1)                                     | 7 (1.2)                                           | 5 (0.9)                                      |
| Viral upper respiratory tract infection              | 4 (0.7)                                            | 6 (1.1)                                     | 6 (1.1)                                           | 7 (1.3)                                      |
| Viral infection                                      | 4 (0.7)                                            | 2 (0.4)                                     | 1 (0.2)                                           | 3 (0.5)                                      |
| Influenza                                            | 3 (0.5)                                            | 1 (0.2)                                     | 2 (0.4)                                           | 2 (0.4)                                      |
| Nasopharyngitis                                      | 1 (0.2)                                            | 2 (0.4)                                     | 4 (0.7)                                           | 2 (0.4)                                      |
| Respiratory tract infection                          | 1 (0.2)                                            | 3 (0.5)                                     | 2 (0.4)                                           | 2 (0.4)                                      |
| Gastroenteritis viral                                | 1 (0.2)                                            | 1 (0.2)                                     | 3 (0.5)                                           | 2 (0.4)                                      |
| Urinary tract infection                              | 1 (0.2)                                            | 4 (0.7)                                     | 0                                                 | 1 (0.2)                                      |
| Injury, poisoning and procedural complications       | 9 (1.6)                                            | 6 (1.1)                                     | 6 (1.1)                                           | 8 (1.4)                                      |
| Fall                                                 | 2 (0.4)                                            | 3 (0.5)                                     | 3 (0.5)                                           | 4 (0.7)                                      |
| Ligament sprain                                      | 1 (0.2)                                            | 0                                           | 3 (0.5)                                           | 2 (0.4)                                      |
| Musculoskeletal and connective tissue disorders      | 6 (1.1)                                            | 6 (1.1)                                     | 7 (1.2)                                           | 7 (1.3)                                      |
| Back pain                                            | 0                                                  | 1 (0.2)                                     | 3 (0.5)                                           | 2 (0.4)                                      |
| Nervous system disorders                             | 7 (1.2)                                            | 3 (0.5)                                     | 9 (1.6)                                           | 6 (1.1)                                      |
| Headache                                             | 4 (0.7)                                            | 2 (0.4)                                     | 2 (0.4)                                           | 4 (0.7)                                      |
| Respiratory, thoracic and mediastinal disorders      | 11 (2.0)                                           | 10 (1.8)                                    | 8 (1.4)                                           | 6 (1.1)                                      |
| Cough                                                | 2 (0.4)                                            | 3 (0.5)                                     | 4 (0.7)                                           | 1 (0.2)                                      |
| Oropharyngeal pain                                   | 1 (0.2)                                            | 4 (0.7)                                     | 2 (0.4)                                           | 2 (0.4)                                      |
| Rhinorrhea                                           | 4 (0.7)                                            | 2 (0.4)                                     | 1 (0.2)                                           | 1 (0.2)                                      |

SIV=seasonal inactivated influenza vaccine.

Results are for the safety population.

<sup>a</sup>Adverse events reported in  $\geq 0.5\%$  of participants in either group or the associated system organ class.

<sup>b</sup>Number of participants in the specified group. This value is the denominator for the percentage calculations.

<sup>c</sup>Number of participants reporting  $\geq 1$  occurrence of the specified event category.

**Figure S1. GMCs and GMFRs for SARS-CoV-2 full-length S-binding IgG from before vaccination to 1 month after vaccination by baseline SARS-CoV-2 status**

Data are for the evaluable BNT162b2 immunogenicity population. Two-sided 95% CIs for GMCs and GMFRs were based on the Student *t* distribution. Baseline SARS-CoV-2 positive was a positive N-binding antibody result at Visit 1 or medical history of SARS-CoV-2 or COVID-19. GMC=geometric mean concentration; GMFR=geometric mean fold rise; IgG=immunoglobulin G.

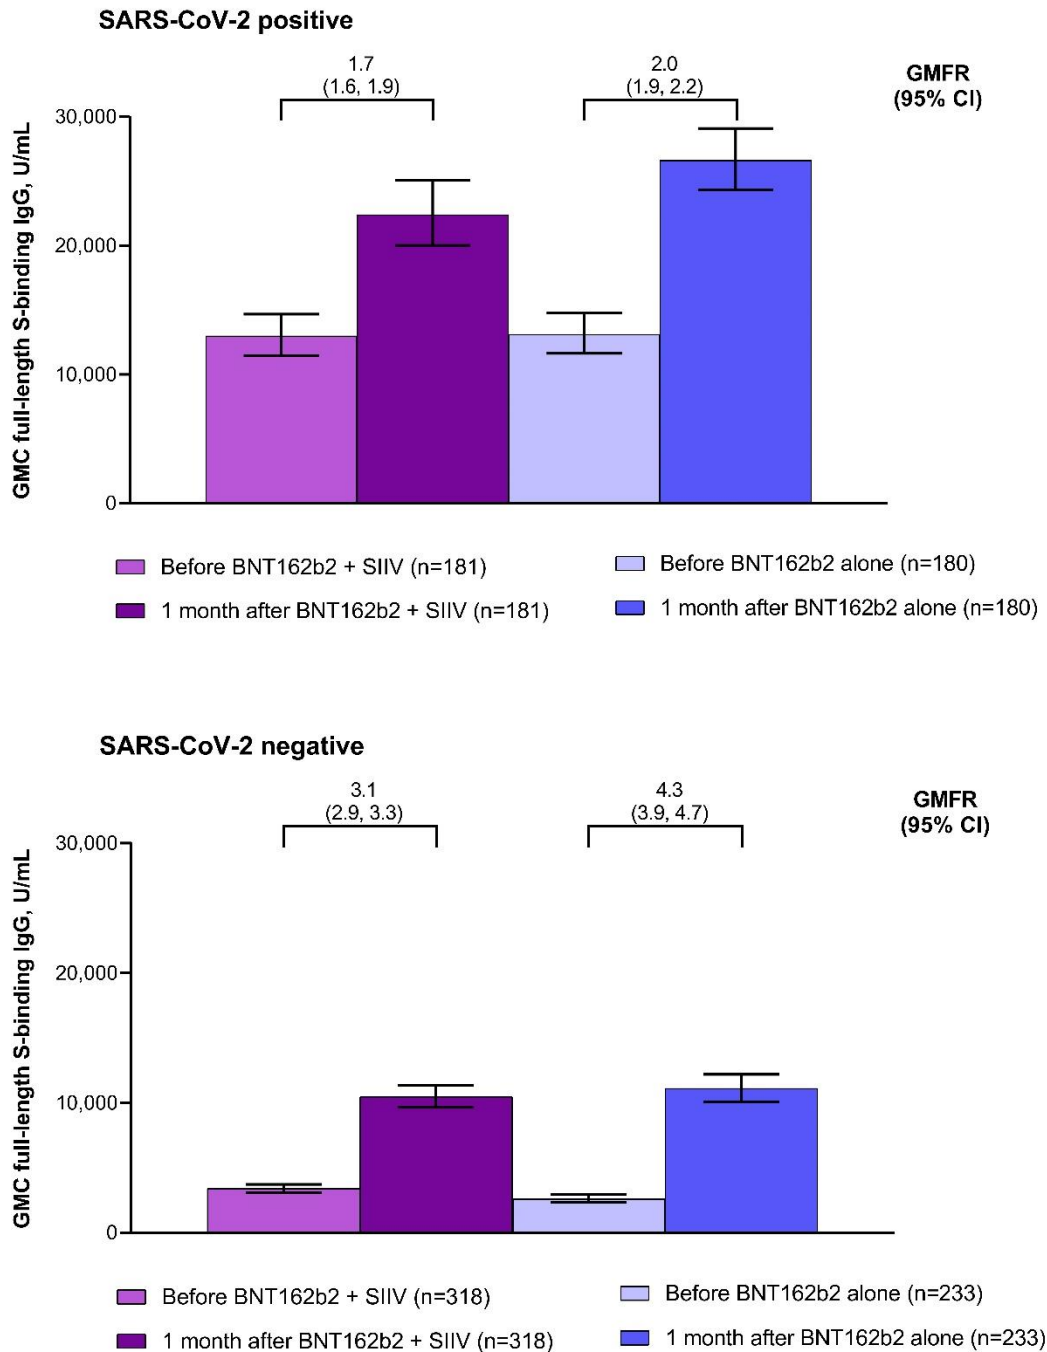

Supplement: MOESM1 [file 26033042]
